# Supplementary figures and images for: 1,3-Butadiene Production Using Ash-Based Catalyst
Source: MDPI journal article supplement (doi:10.3390/catal13020258), 2023-01-22

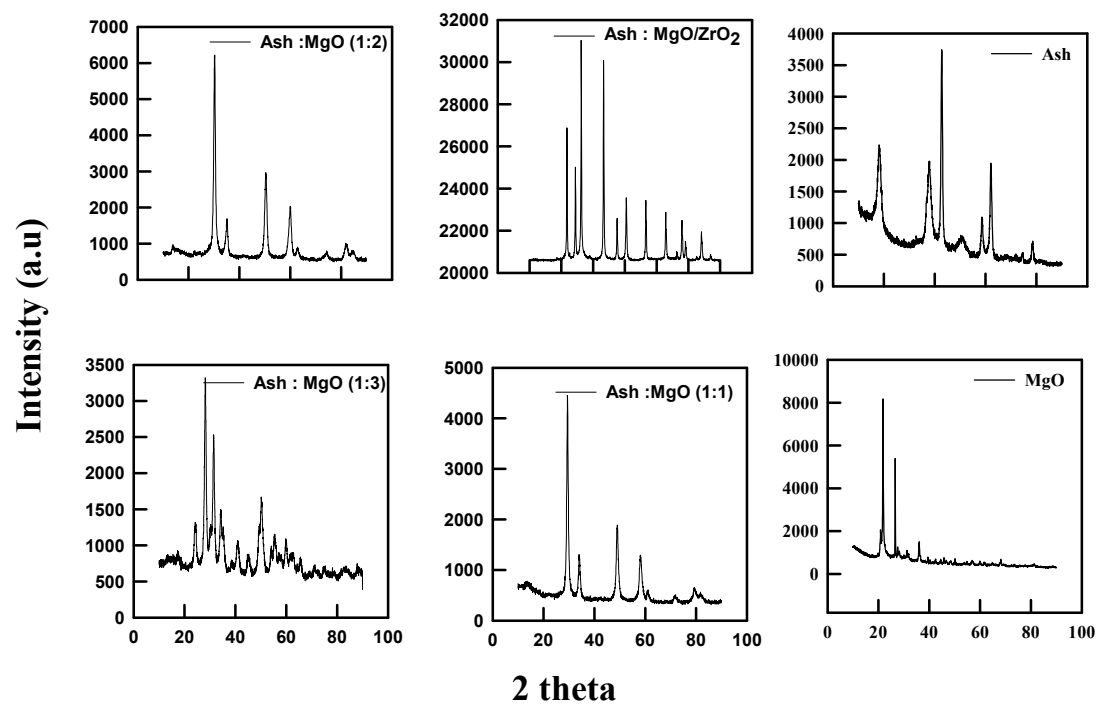

Figure S1 XRD for blank ash and with different combination.

Supplement: s1 [file s1]
